# Supplementary material
Source: HighWire-hosted journal article supplement (https://www.g3journal.org/content/suppl/2015/02/09/g3.114.015875)
Supplement: TableS1.pdf [file TableS1.pdf]

**Table S1 Primers used in this study**

| Gene                | Species | Name       | Sequence                 |
|---------------------|---------|------------|--------------------------|
| <i>cyclin A</i> (1) | mel/sim | cycaF1     | CAGTTTCCAGATCCACCAAG     |
| <i>cyclin A</i> (1) | mel/sim | cycaR1     | TTTAGCTTACCTCGCTCTCC     |
| <i>cyclin A</i> (2) | mel/sim | cycaF2     | TCTCCAGAAGAAACATCGC      |
| <i>cyclin A</i> (2) | mel/sim | cycaR2     | GTATTAATATCCGGCTGCTG     |
| <i>nanos</i>        | mel/sim | nosF1      | CAGCAACTTGGAGGGCAGTG     |
| <i>nanos</i>        | mel/sim | nosR1      | AAACCTTCATCTGTTGCTTG     |
| <i>fs(1)Yb</i>      | mel     | yb_sim_F1  | CCTCGCTAGCCGTACATATATTAG |
| <i>fs(1)Yb</i>      | mel     | yb_sim_R1  | GGTCAGTGGACAGTGATGAAAC   |
| <i>mei-P26</i>      | mel/sim | mei-p26_F2 | GATGGGCTTTTGTGAACGG      |
| <i>mei-P26</i>      | mel/sim | mei-p26_R2 | TGCTGTTGCAGATGGTGTG      |
| <i>piwi</i>         | mel/sim | piwi_F1    | TTCAAAGTACTCTTTCAGTTTCC  |
| <i>piwi</i>         | mel/sim | piwi_R1    | GTCTGGGCTAGTTTCATATATGG  |
| <i>pumilio</i> (1)  | mel/sim | pum_F1     | CCCTACTTTC AACAGCTACAC   |
| <i>pumilio</i> (1)  | mel     | pum_R1     | CAAGCCAAGAAAGTTAACC      |
| <i>pumilio</i> (1)  | sim     | pum_sim_R1 | CAAGCCAAGAAAATTAACC      |
| <i>pumilio</i> (2)  | mel/sim | pum_F3     | GATATTTGCTTTCCTGGAAGCC   |
| <i>pumilio</i> (2)  | mel/sim | pum_R3     | GTCTGGGGTCTTTAGTCGG      |
| <i>pumilio</i> (3)  | mel     | pum_F4     | GGCTAAGTGGTGAATACAG      |
| <i>pumilio</i> (3)  | sim     | pum_sim_F4 | AACGTTTTAATGATAGCTTG     |
| <i>pumilio</i> (3)  | mel     | pum_R4     | GAAAATGTCACTCTGGGGAC     |
| <i>pumilio</i> (3)  | sim     | pum_sim_R4 | GAAAATGTCACTCTGGAGAC     |
| <i>pumilio</i> (4)  | mel     | pum_F8     | CATTCTCCTATACCTTTCC      |

|                      |         |            |                       |
|----------------------|---------|------------|-----------------------|
| <i>pumilio</i> (4)   | sim     | pum_sim_F8 | CATTCTCTTTGATACCTCTCC |
| <i>pumilio</i> (4)   | mel/sim | pum_R8     | GAAGTTTCCTTTGACTGCCTG |
| <i>stonewall</i> (1) | mel/sim | stwl_F1_1  | GATTGTGTGAATTGCGTTTG  |
| <i>stonewall</i> (1) | mel/sim | stwl_R1_1  | CTAATGGGCGATTAGTGTTAC |
| <i>stonewall</i> (2) | mel/sim | stwl_F2    | CTAGCCTTATCATTCCCTC   |
| <i>stonewall</i> (2) | mel/sim | stwl_R2    | CTCTTTAATCAATACTCGG   |
| <i>zpg</i>           | mel     | zpg_F1     | GTCAAACCTTTACAACCGCC  |
| <i>zpg</i>           | sim     | zpg_sim_F1 | GTCAAACCTTTACAAGCACC  |
| <i>zpg</i>           | mel     | zpg_R1     | GATTAAACTTGGCGTCATC   |
| <i>zpg</i>           | sim     | zpg_sim_R1 | GATTAAACTTGGTGTCATC   |

---
